# Supplementary material for: Synthesis, Characterization, and Photocatalytic Performance of ZnFe2O4-g-C3N4 Composites for Tetracycline Removal from Contaminated Water
Source: Hindawi journal article supplement (doi:10.1155/2024/6687926), 2024-03-18
Supplement: f1 [file 6687926.f1.docx]

**Supplementary Materials**

1. **Photocatalytic Setup**

The solar parabolic trough reactor (PTR) setup used in conducting the experiments is shown in Figure S1. The photoreactor consisted of a collector made of transparent borosilicate glass tube (diameter: 25mm, length: 80cm, thickness: 2mm) and an aluminum reflector. The reactor was placed in the East-West direction and a manual tracking system was used in tracking the sun, guided by a solar radiometer (PCE-SPM1, PCE instruments). The collector was connected to a magnetically stirred feed tank by plastic pipes and fittings. A small peristaltic pump circulated the slurry mixture at a flowrate of 1Litre/minute.


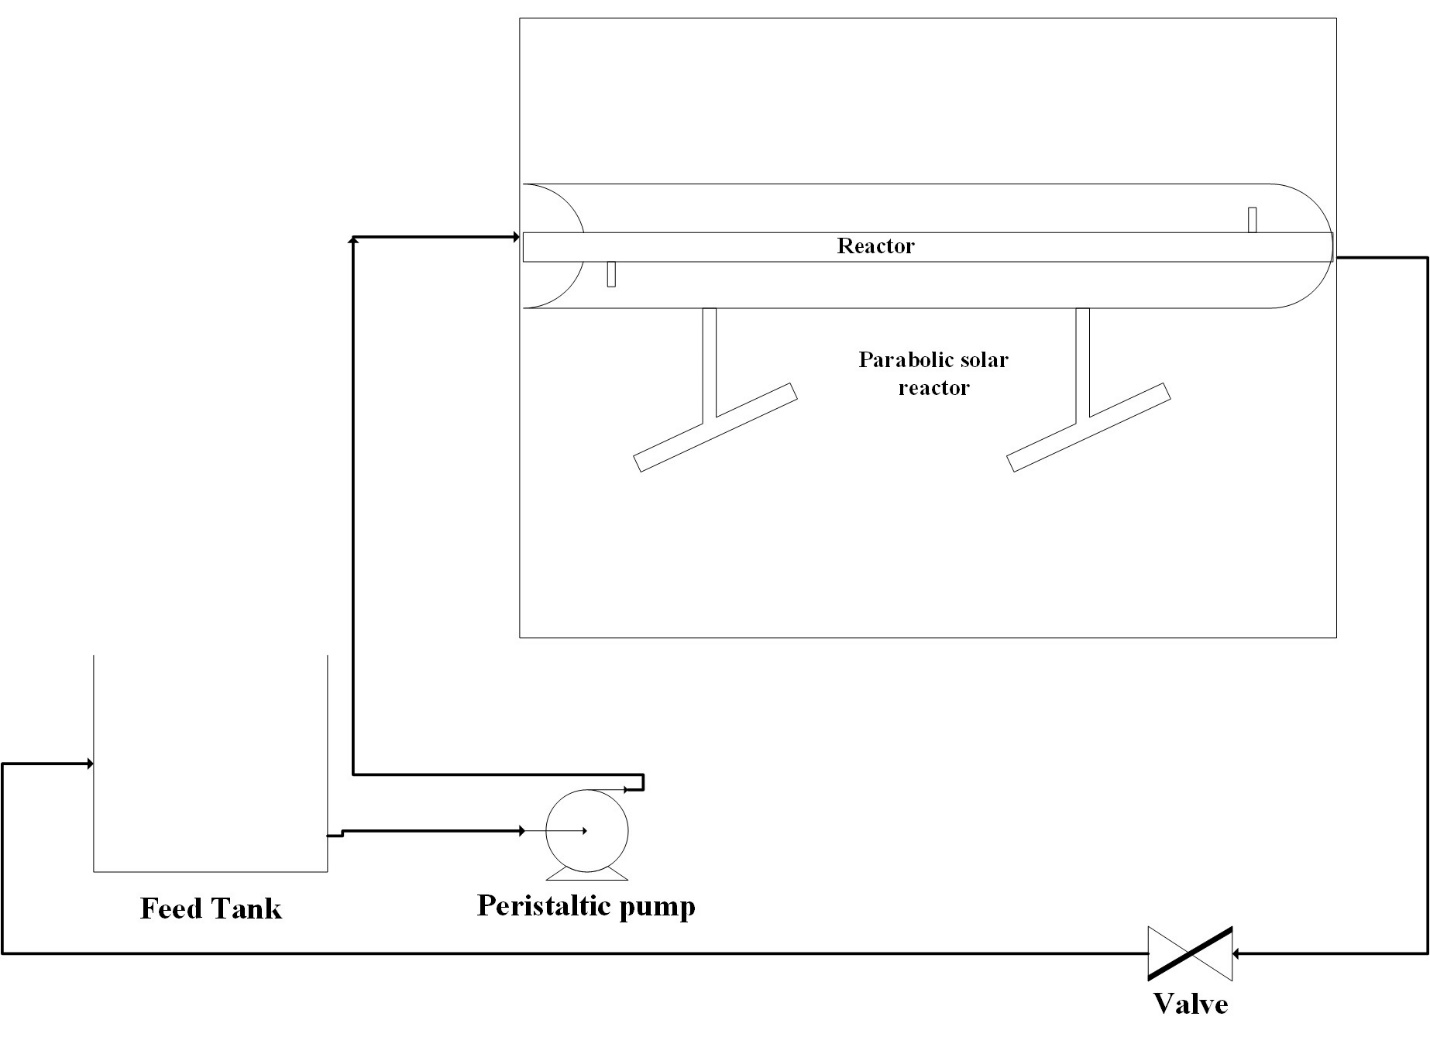


**Figure S1: Photocatalytic setup of the slurry solar parabolic trough reactor (PTR) used in data collection**

1. **Second order Kinetic fitting data**

Origin Pro v2021 software was used in fitting the degradation data for the seven photocatalysts (g-C3N4, ZnFe2O4, 5%ZF-GCN, 15%ZF-GCN, 25%ZF-GCN, EY-25%ZF-GCN and Anatase Titania) shown in Table S1. A pseudo second order equation shown below was used in fitting the data; …………………………..Equation S1

where Co= initial concentration, Ct= Concentration at time t (mg/l), kapp=apparent kinetic constant (mg-1.L.min-1).

Table S1 shows the apparent kinetic constant for each photocatalyst and their respective coefficient of determination (R2).

**Table S1: Second Order fitting Data for Tetracycline Degradation**

| **Equation** | **y = a + b*x** | | | | | |  |
| --- | --- | --- | --- | --- | --- | --- | --- |
| **Plot** | **5%ZF-GCN** | **15%ZF-GCN** | **25%ZF-GCN** | **Sensitized** | **g-C3N4** | **ZnFe2O4** | **Anatase** |
| Weight | No Weighting | | | | | |  |
| Intercept | 0.09296 ± 0.02547 | 0.09196 ± 0.05266 | 0.1773 ± 0.04218 | 0.12798 ± 0.06404 | 0.0265 ± 0.007 | 0.06779 ± 0.01054 | 0.02828 ± 0.03559 |
| **Kapp Constant** | 0.00504 ± 5.02851E-4 | 0.00916 ± 0.00104 | 0.01491 ± 8.3287E-4 | 0.01668 ± 0.00126 | 0.00101 ± 1.38155E-4 | 0.00312 ± 2.0821E-4 | 0.00538 ± 7.02719E-4 |
| Residual Sum of Squares | 0.0056 | 0.02393 | 0.01536 | 0.0354 | 4.22581E-4 | 9.59797E-4 | 0.01093 |
| Pearson's r | 0.9854 | 0.98123 | 0.99535 | 0.99149 | 0.97296 | 0.9934 | 0.97538 |
| **R-Square (COD)** | 0.97101 | 0.9628 | 0.99072 | 0.98305 | 0.94665 | 0.98684 | 0.95137 |
| Adj. R-Square | 0.96135 | 0.9504 | 0.98763 | 0.9774 | 0.92886 | 0.98245 | 0.93515 |
